# Supplementary material for: Two-dimensional semiconductors ZrNCl and HfNCl: Stability, electric transport, and thermoelectric properties
Source: PubMed Central journal article supplement (PMC5725492; doi:10.1038/s41598-017-17590-w), 2017-12-11
Supplement: 41598_2017_17590_MOESM1_ESM.pdf [file 41598_2017_17590_MOESM1_ESM.pdf]

## Supplementary Information

# Two-dimensional semiconductors ZrNCl and HfNCl: Stability, electric transport, and thermoelectric properties

Won Seok Yun and J. D. Lee\*

Department of Emerging Materials Science, DGIST, Daegu 42988, Republic of Korea.

\*Corresponding author: [jdlee@dgist.ac.kr](mailto:jdlee@dgist.ac.kr)

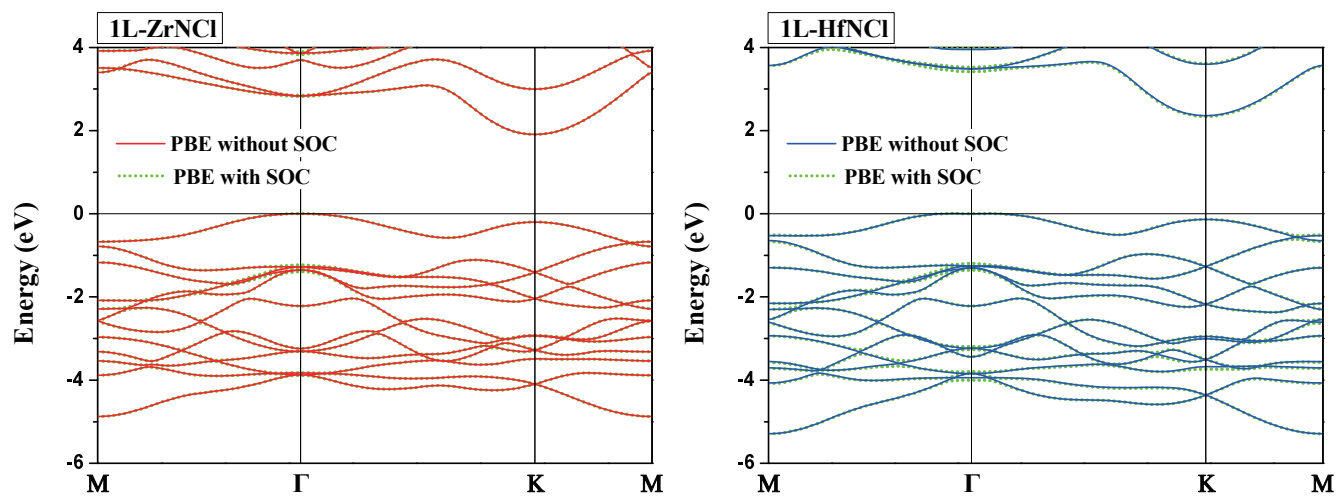

**Figure S1.** Electronic band structures of 1L-ZrNCl (left panel) and 1L-HfNCl (right panel) calculated by the PBE functional with spin-orbit coupling (SOC) (green dotted lines) and without SOC (red/blue solid lines). The valence band maximum is set to zero and inclusion of SOC does not change the electronic band structure.

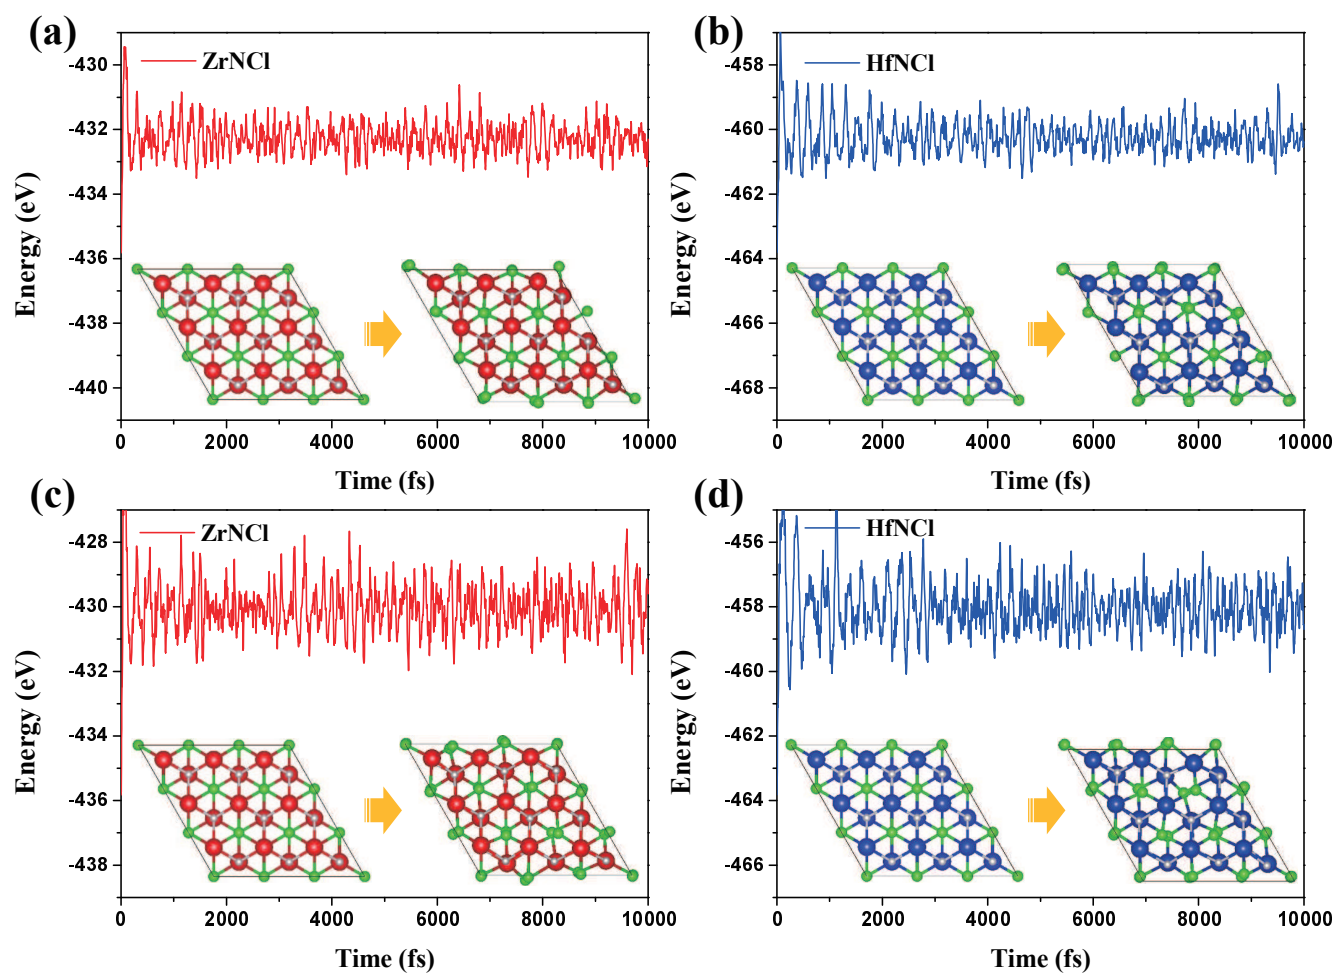

**Figure S2.** Total energy fluctuation during the AIMD simulation for 1L-ZrNCl (left panels) and 1L-HfNCl (right panels) at (a,b) 500 K and (c,d) 800 K. The insets in (a-d) show the snapshots of the atomic configuration at 0 ps (left) and 10 ps (right).

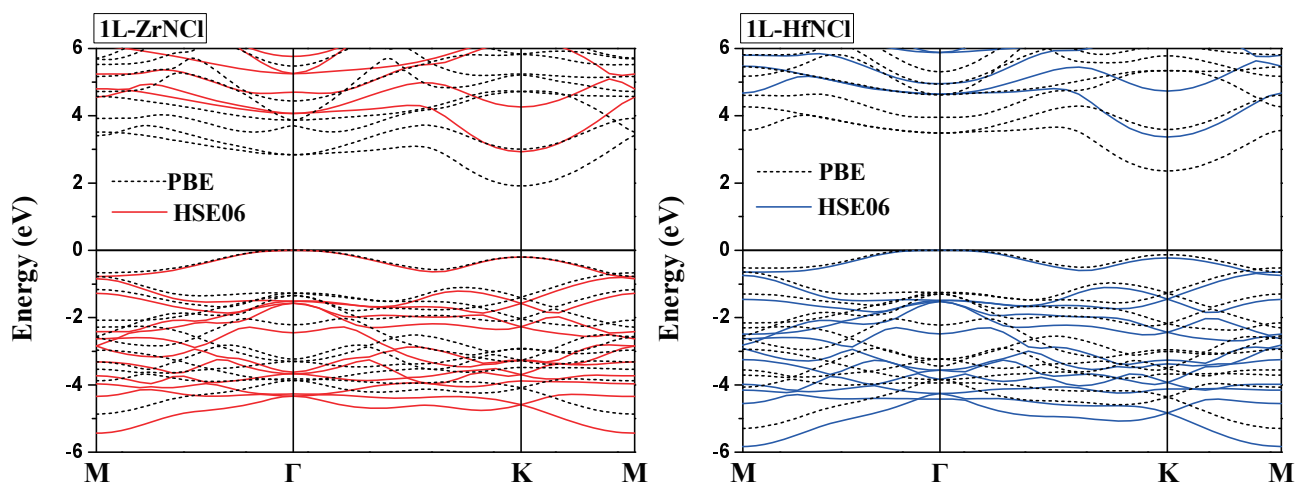

**Figure S3.** Electronic band structures of 1L-ZrNCl (left panel) and 1L-HfNCl (right panel) calculated with the PBE (dotted lines) and HSE06 (red/blue solid lines) functionals.

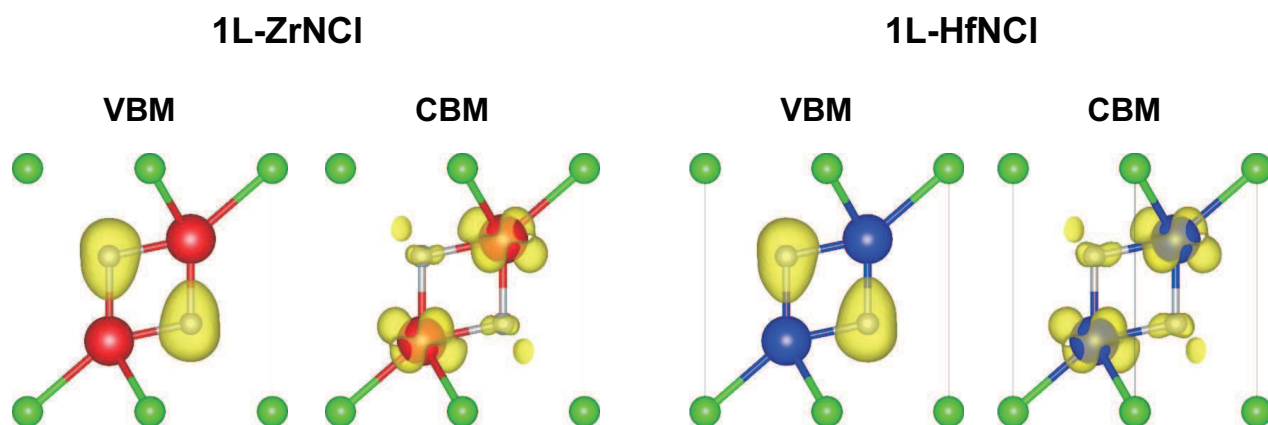

**Figure S4.** Side-views of 1L-ZrNCl (left panel) and 1L-HfNCl (right panel). The yellow distributions represent the charge density isosurfaces of the valence band maximum (VBM) and conduction band minimum (CBM) states. The isosurface value is taken as  $0.01 e\text{\AA}^{-3}$ .

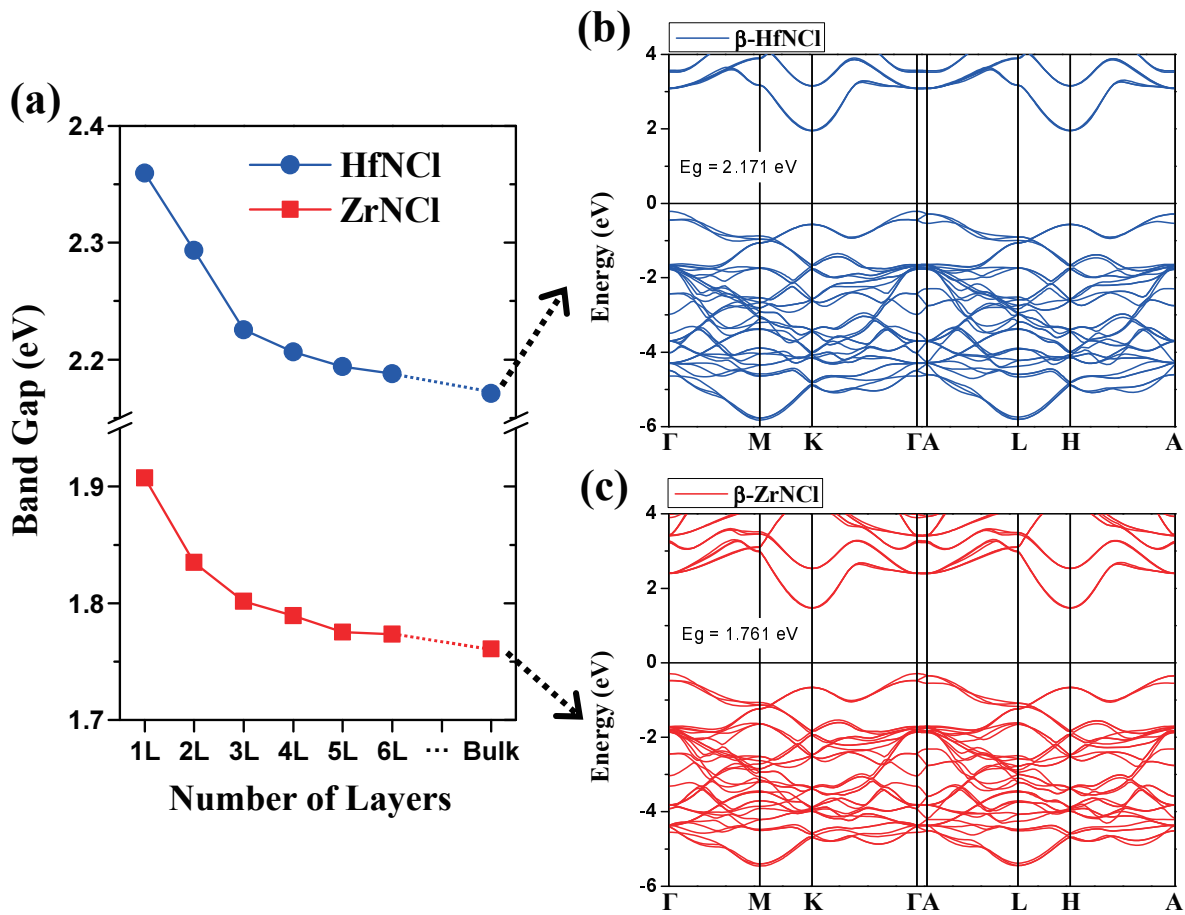

**Figure S5.** (a) Evolution of the indirect band gap ( $\Gamma$ -K) as a function of the thickness of both ZrNCl and HfNCl. Calculated electronic band structures of (b) bulk ZrNCl (lower panel) and (c) bulk HfNCl (upper panel).
